# Supplementary material for: Effect of the Particle Size Distribution of Irregular Al Powder on Properties of Parts for Electronics Fabricated by Binder Jetting
Source: MDPI journal article supplement (doi:10.3390/electronics12122733), 2023-06-19
Supplement: s1 [file s1]

# Effect of the Particle Size Distribution of Irregular Al Powder on Properties of Parts for Electronics Fabricated by Binder Jetting

Joanna Marczyk and Marek Hebda \*

Faculty of Materials Engineering and Physics, Cracow University of Technology,  
Warszawska 24, 31-155 Cracow, Poland; joanna.marczyk@pk.edu.pl

\* Correspondence: marek.hebda@pk.edu.pl

## Supplementary Materials

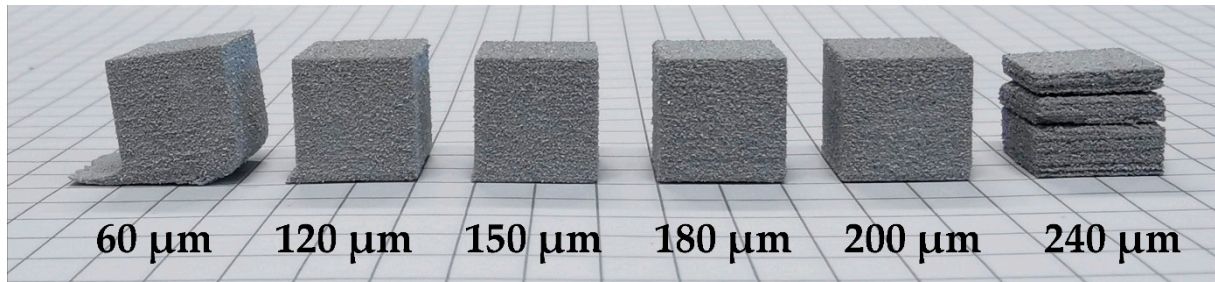

**Figure S1.** AL160 parts printed with a variable layer thickness (from the left: 60  $\mu\text{m}$ , 120  $\mu\text{m}$ , 150  $\mu\text{m}$ , 180  $\mu\text{m}$ , 200  $\mu\text{m}$ , and 240  $\mu\text{m}$ )

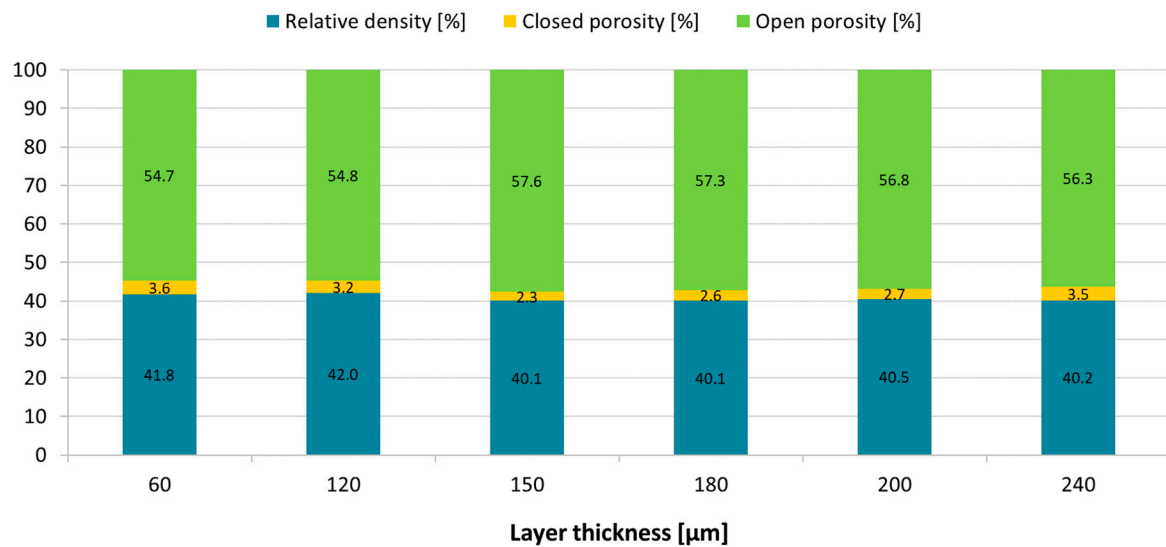

**Figure S2.** Influence of layer thickness on relative density and porosity of AL160 samples

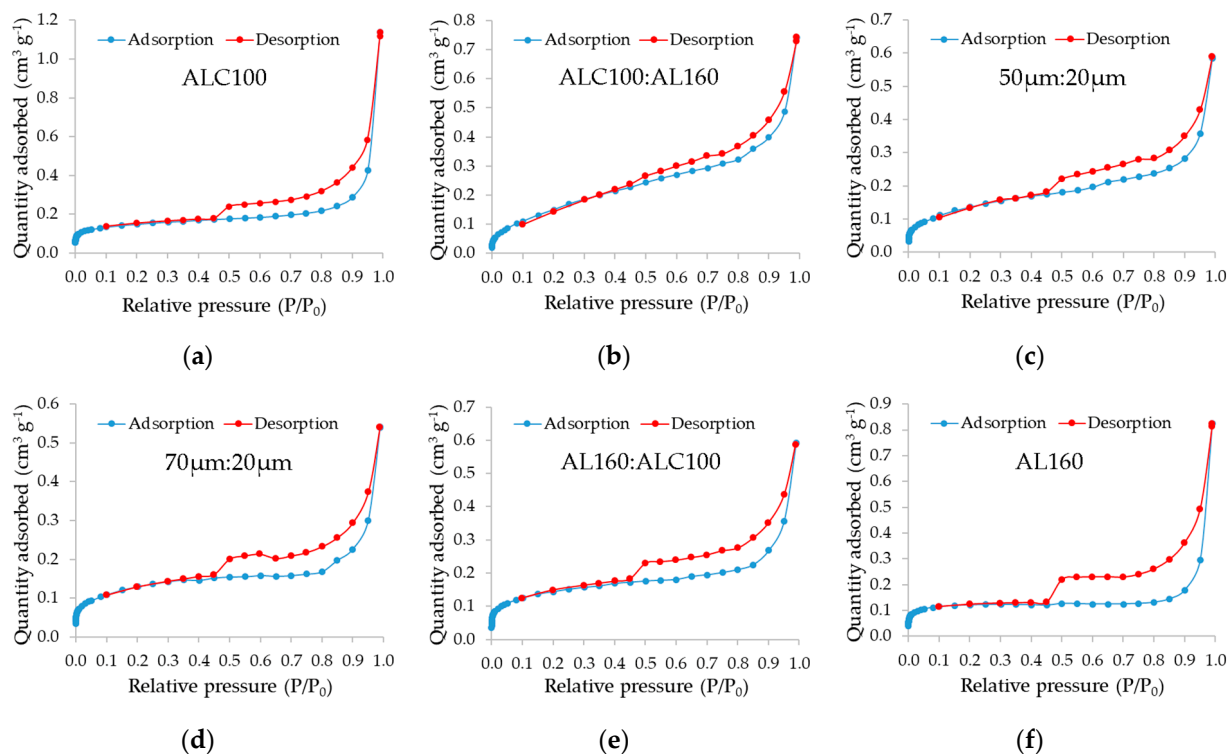

**Figure S3.** Nitrogen adsorption-desorption isotherms of aluminum powders: (a) ALC100; (b) ALC100:AL160; (c) 50  $\mu$ m:20  $\mu$ m; (d) 70  $\mu$ m:20  $\mu$ m; (e) AL160:ALC100; (f) AL160, where (b–e) were made with a share of 73-27 wt. %

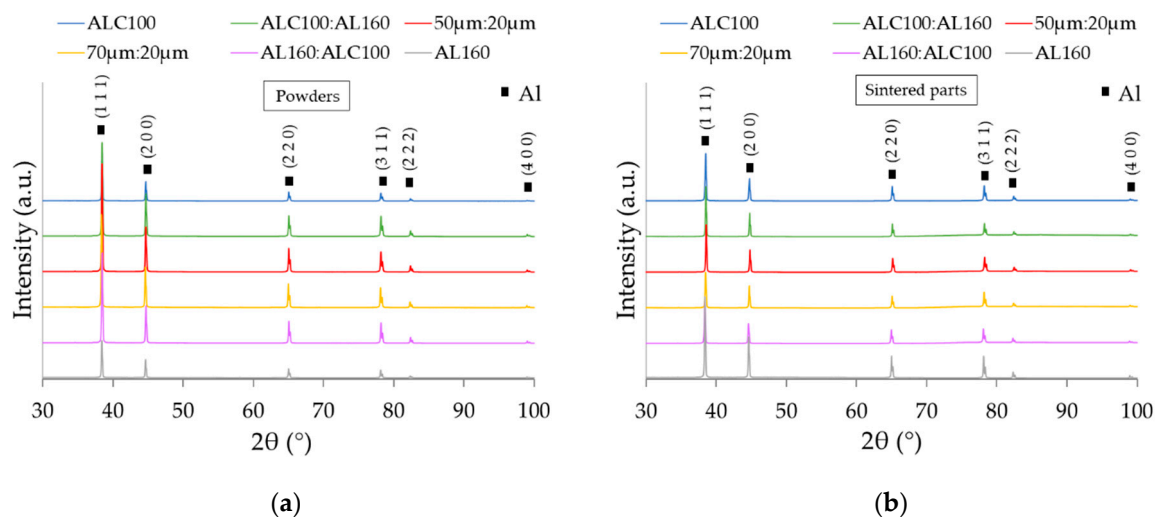

**Figure S4.** XRD patterns for (a) aluminum powders; (b) 3D printed parts with the Binder Jetting method.
